# Supplementary material
Source: HighWire-hosted journal article supplement (https://jech.bmj.com/content/77/12/791)
Supplement: inline-supplementary-material-1 [file inline-supplementary-material-1.pdf]

**Appendix A : Protocol**

[https://www.crd.york.ac.uk/PROSPERO/display\\_record.php?RecordID=112260](https://www.crd.york.ac.uk/PROSPERO/display_record.php?RecordID=112260)

**Appendix B: Search strategy (up to October 3<sup>rd</sup>, 2018)****Literature search****PubMed:**

("influenza, human"[MeSH Terms] OR "influenzavirus a"[MeSH Terms] OR "influenzavirus b"[MeSH Terms] OR flu[Title/Abstract] OR influenza\*[Title/Abstract] OR "influenza vaccines"[MeSH Terms]) AND ("Vaccines"[Mesh:noexp] OR "Vaccines, Attenuated"[Mesh] OR "Vaccines, Inactivated"[Mesh:noexp] OR "Vaccines, Subunit"[Mesh] OR "Vaccines, Synthetic"[Mesh] OR "Viral Vaccines"[Mesh:noexp] OR vaccin\*[Title/Abstract] OR inocul\*[Title/Abstract] OR immuni\*[Title/Abstract] OR "immunization"[MeSH Terms] OR "vaccination"[MeSH Terms] OR "adjuvants, immunologic"[MeSH Terms] OR adjuvant\*[Title/Abstract] OR immunostimul\*[Title/Abstract] OR immunomodul\*[Title/Abstract] OR immunotherap\*[Title/Abstract] OR "influenza vaccines"[MeSH Terms]) AND ("Dose-Response Relationship, Immunologic"[Mesh] OR "immunogenicity, vaccine"[MeSH Terms] OR "immunity, humoral"[MeSH Terms] OR "adaptive immunity"[MeSH:noexp] OR "antibody formation"[MeSH:noexp] OR "safety"[MeSH:noexp] OR "immunology"[MeSH Subheading] OR "adverse effects"[MeSH Subheading] OR hemagglutinin\*[Title/Abstract] OR Microneutrali\*[Title/Abstract] OR immunogen\*[Title/Abstract] OR efficacy[Title/Abstract] OR adverse effect\*[Title/Abstract] OR AEFI[Title/Abstract] OR SAE[Title/Abstract]) AND ("aged"[MeSH Terms] OR "age factors"[MeSH Terms] OR "middle aged"[MeSH Terms] OR "aged, 80 and over"[MeSH Terms] OR "young adult"[MeSH Terms] OR "adult"[MeSH Terms] OR adult\*[Title/Abstract]) AND (randomized controlled trial[pt] OR controlled clinical trial[pt] OR randomized[tiab] OR randomised[tiab] OR placebo[tiab] OR drug therapy[sh] OR randomly[tiab] OR trial[tiab] OR groups[tiab] NOT (animals[mh] NOT humans[mh]))

**CINAHL**

( (MH "Influenza") OR "influenza" OR (MH "Influenza A Virus") OR (MH "Influenza B Virus") OR (MH "Influenza Vaccine") OR (MH "Influenza, Human") OR (MH "Influenza, Seasonal") OR influenza\* OR flu OR influenza vaccin\* ) **AND** ( (MH "Immunization") OR "vaccination" OR (MH "Influenza Vaccine") OR (MH "Vaccines") OR (MH "Viral Vaccines") OR (MH "Attitude to Vaccines") OR (MH "Immunotherapy") OR (MH "Immunization, Secondary") OR Vaccin\* OR inocul\* OR immuni\* OR adjuvant\* OR immunostimul\* OR immunomodul\* OR immunotherap\* ) **AND** ( (MH "Treatment Outcomes") OR "hemagglutinin\*" OR "Microneutrali\*" OR "immunogen\*" OR "efficacy" OR "adverse effect\*" OR "adverse event\*" OR "AEFI" OR "SAE" OR "antibod\*" OR "safety" OR "reactogenicity" ) **AND** ( (MH "Random Assignment") or (MH "Random Sample+") or (MH "Crossover Design") or (MH "Clinical Trials+") or (MH "Comparative Studies") or (MH "Control (Research)+") or (MH "Control Group") or (MH "Factorial Design") or (MH "Quasi-Experimental Studies+") or (MH "Placebos") or (MH "Meta Analysis") or (MH "Sample Size") or (MH "Research, Nursing") or (MH "Research Question") or (MH "Research Methodology+") or (MH "Evaluation Research+") or (MH "Concurrent Prospective Studies") or (MH "Prospective Studies") or (MH "Nursing Practice, Research-Based") or (MH "Solomon Four-Group Design") or (MH "One-Shot Case Study") or (MH "Pretest-Posttest Design+") or (MH "Static Group Comparison") or (MH "Study Design") or (MH "Clinical Research+")) or ( clinical nursing research or random\* or cross?over or placebo\* or control\* or factorial or sham\* or meta?analy\* or systematic review\* or blind\* or mask\* or trial\* )

(Academic publications)

**Embase**

1. exp influenza/
2. exp Influenza virus A/
3. exp Influenza virus B/
4. Influenza virus/
5. flu.tw.
6. "influenza\*".tw.
7. 1 or 2 or 3 or 4 or 5 or 6
8. vaccine/
9. live vaccine/
10. inactivated vaccine/
11. subunit vaccine/
12. recombinant vaccine/
13. virus vaccine/
14. exp immunization/
15. exp vaccination/
16. exp immunological adjuvant/
17. influenza vaccine/
18. "vaccin\*".tw.
19. inocul\*.tw.
20. immuni\*.tw.
21. adjuvant\*.tw.
22. immunostimul\*.tw.
23. immunomodul\*.tw.
24. immunotherap\*.tw.
25. 8 or 9 or 10 or 11 or 12 or 13 or 14 or 15 or 16 or 17 or 18 or 19 or 20 or 21 or 22 or 23 or 24
26. exp dose response/
27. vaccine immunogenicity/
28. exp humoral immunity/
29. adaptive immunity/
30. antibody production/
31. safety/
32. side effect.fs.
33. adverse drug reaction.fs.
34. hemagglutin\*.tw.
35. Microneutrali\*.tw.
36. immunogen\*.tw.
37. efficacy.tw.
38. adverse effect\*.tw.
39. AEFI.tw.
40. SAE.tw.
41. 26 or 27 or 28 or 29 or 30 or 31 or 32 or 33 or 34 or 35 or 36 or 37 or 38 or 39 or 40
42. infant/
43. child/ or preschool child/ or school child/
44. adolescent/
45. 42 or 43 or 44
46. adult/ or aged/
47. 45 not 46

48. exp animal/ or nonhuman/  
 49. exp human/  
 50. 48 not 49  
 51. crossover-procedure/ or double-blind procedure/ or randomized controlled trial/ or single-blind procedure/ or (random\* or factorial\* or crossover\* or cross over\* or placebo\* or (doubl\* adj blind\*) or (singl\* adj blind\*) or assign\* or allocat\* or volunteer\*).tw.  
 52. 7 and 25 and 41 and 51  
 53. 52 not 47  
 54. 53 not 50  
 55. limit 54 to yr="2010 -Current"  
 56. limit 55 to (english or french)  
 57. limit 56 to embase

#### Web of Science

- # 5 [2,779](#) (#4 AND #3 AND #2 AND #1) AND **LANGUAGE:** (English OR French) AND **DOCUMENT TYPES:** (Article)  
 Indexes=SCI-EXPANDED, SSCI, A&HCI, CPCI-S, CPCI-SSH, ESCI Timespan=2010-2018
- # 4 [2,342,818](#) (TS= clinical trial\* OR TS=research design OR TS=comparative stud\* OR TS=evaluation stud\* OR TS=controlled trial\* OR TS=follow-up stud\* OR TS=prospective stud\* OR TS=random\* OR TS=placebo\* OR TS=(single blind\*) OR TS=(double blind\*))  
 Indexes=SCI-EXPANDED, SSCI, A&HCI, CPCI-S, CPCI-SSH, ESCI Timespan=2010-2018
- # 3 [1,166,035](#) (TS=(hemagglutin\* OR Microneutrali\* OR immunogen\* OR efficacy OR adverse effect\* OR adverse event\* OR AEFI OR SAE OR antibod\* OR safety OR reactogenicity))  
 Indexes=SCI-EXPANDED, SSCI, A&HCI, CPCI-S, CPCI-SSH, ESCI Timespan=2010-2018
- # 2 [417,224](#) (TS=(Vaccin\* OR inocul\* OR immuni\* OR adjuvant\* OR immunostimul\* OR immunomodul\* OR immunotherap\*))  
 Indexes=SCI-EXPANDED, SSCI, A&HCI, CPCI-S, CPCI-SSH, ESCI Timespan=2010-2018
- # 1 [60,932](#) (TS= (influenza\* OR flu OR influenza vaccin\*))  
 Indexes=SCI-EXPANDED, SSCI, A&HCI, CPCI-S, CPCI-SSH, ESCI Timespan=2010-2018

#### Clinical trials search:

**Clinical Study Data Request :** ([ClinicalStudyDataRequest.com](https://clinicalstudydatarequest.com))

Influenza vaccine

**ClinicalTrials.gov :** (<https://clinicaltrials.gov/>)

immunogenicity OR efficacy OR safety OR reactogenicity OR adverse events OR adverse effects OR antibody titer | Influenza OR influenza, A OR influenza, B OR influenza, human OR Influenza vaccine | Adult, Older Adult | Phase 3 | Start date on or after 01/01/2010

**European Organisation for Research and treatment of Cancer Clinical Trials Database:**

(<https://www.eortc.org/clinical-trials-database/>)

influenza vaccine

**European Union Clinical Trials Register:** (<https://www.clinicaltrialsregister.eu>)

(influenza OR flu) AND vaccine

**World Health Organization International Clinical Registry Platform:** (<https://www.who.int/clinical-trials-registry-platform>)

No keyword, a list of studies was uploaded on 3<sup>rd</sup> October 2018.

**Health Canada's Clinical Trials Database:** (<https://health-products.canada.ca/ctdb-bdec/index-eng.jsp>)

Key words: Influenza vaccine

## Appendix C:

**Table C1: Exclusion criteria for chronic medical conditions and previous influenza vaccination history for each included study (N=18)**

| Study ID                     | Exclusion criteria for chronic medical conditions (non-exhaustive list)                                                                                                            | Previous influenza vaccination history <sup>a</sup><br>N (%) |
|------------------------------|------------------------------------------------------------------------------------------------------------------------------------------------------------------------------------|--------------------------------------------------------------|
| <b>Sanofi Pasteur</b>        |                                                                                                                                                                                    |                                                              |
| GQM01                        | Immunocompromised persons                                                                                                                                                          | 814 (51.9%)                                                  |
| GQM04                        | Chronic illness that, in the opinion of the investigator, is at a stage where it might interfere with trial conduct or completion/<br>immunocompromised persons                    | 626 (40.0%)                                                  |
| GQM07                        | Chronic illness that, in the opinion of the investigator, is at a stage where it might interfere with trial conduct or completion/<br>immunocompromised persons                    | 118 (39.3%)                                                  |
| GQM11                        | Chronic illness that, in the opinion of the investigator, is at a stage where it might interfere with trial conduct or completion/<br>immunocompromised persons                    | 1065 (47.9%)                                                 |
| QID01                        | Chronic illness that, in the opinion of the investigator, is at a stage where it might interfere with trial conduct or completion/<br>immunocompromised persons                    | 1272 (37.9%)                                                 |
| QIV03                        | Any condition that in the opinion of the investigator would pose a health risk to the subject or could interfere with the evaluation of the vaccine/<br>immunocompromised persons  | NA                                                           |
| QIV06                        | Chronic illness that, in the opinion of the investigator, is at a stage where it might interfere with trial conduct or completion/<br>immunocompromised persons                    | NA                                                           |
| RPV03C                       | Chronic disease that is unstable or any intercurrent illness that might interfere with the ability to participate fully in the study; or interfere with evaluation of the vaccine. | 532 (55.8%)                                                  |
| <b>GlaxoSmithKline (GSK)</b> |                                                                                                                                                                                    |                                                              |
| 112963                       | Uncontrolled medical condition/immunocompromised persons                                                                                                                           | 1173 (68.7%)                                                 |

| Study ID                                                                                                                                                                                                                                                                                                                                                                                                                                                                                                                                                                                                                                                                                                                                                                                                                                                                                                                                                                                                                                                                                                                                  | Exclusion criteria for chronic medical conditions (non-exhaustive list)                                                                                                                                                                               | Previous influenza vaccination history <sup>a</sup> N (%) |
|-------------------------------------------------------------------------------------------------------------------------------------------------------------------------------------------------------------------------------------------------------------------------------------------------------------------------------------------------------------------------------------------------------------------------------------------------------------------------------------------------------------------------------------------------------------------------------------------------------------------------------------------------------------------------------------------------------------------------------------------------------------------------------------------------------------------------------------------------------------------------------------------------------------------------------------------------------------------------------------------------------------------------------------------------------------------------------------------------------------------------------------------|-------------------------------------------------------------------------------------------------------------------------------------------------------------------------------------------------------------------------------------------------------|-----------------------------------------------------------|
| 201251                                                                                                                                                                                                                                                                                                                                                                                                                                                                                                                                                                                                                                                                                                                                                                                                                                                                                                                                                                                                                                                                                                                                    | Any condition which, in the opinion of the investigator, prevents the subject from participating in the study/immunocompromised persons                                                                                                               | 34 (28.3%)                                                |
| 114269                                                                                                                                                                                                                                                                                                                                                                                                                                                                                                                                                                                                                                                                                                                                                                                                                                                                                                                                                                                                                                                                                                                                    | Chronic, clinically significant pulmonary, cardiovascular, hepatic or renal functional abnormality/Immunocompromised persons                                                                                                                          | 3669 (78.8%)                                              |
| 117036                                                                                                                                                                                                                                                                                                                                                                                                                                                                                                                                                                                                                                                                                                                                                                                                                                                                                                                                                                                                                                                                                                                                    | Any condition which, in the opinion of the investigator, prevents the subject from participating in the study/immunocompromised persons                                                                                                               | 600 (72.4%)                                               |
| <b>CSL Seqirus</b>                                                                                                                                                                                                                                                                                                                                                                                                                                                                                                                                                                                                                                                                                                                                                                                                                                                                                                                                                                                                                                                                                                                        |                                                                                                                                                                                                                                                       |                                                           |
| CSLCT-QIV-13-01                                                                                                                                                                                                                                                                                                                                                                                                                                                                                                                                                                                                                                                                                                                                                                                                                                                                                                                                                                                                                                                                                                                           | Any clinically significant disease or finding that, in the investigator's opinion, precluded study participation /immunocompromised persons.                                                                                                          | 3 039 (87.3%)                                             |
| V118-18                                                                                                                                                                                                                                                                                                                                                                                                                                                                                                                                                                                                                                                                                                                                                                                                                                                                                                                                                                                                                                                                                                                                   | Any underlying medical condition with fatal prognosis within 12 months/immunocompromised persons.                                                                                                                                                     | 4 064 (59.9%)                                             |
| V58-23                                                                                                                                                                                                                                                                                                                                                                                                                                                                                                                                                                                                                                                                                                                                                                                                                                                                                                                                                                                                                                                                                                                                    | Chronic illness that would interfere with the subject's safety and/or could interfere with the evaluation of study vaccine/immunocompromised persons                                                                                                  | 458 (29.4%)                                               |
| V70-27                                                                                                                                                                                                                                                                                                                                                                                                                                                                                                                                                                                                                                                                                                                                                                                                                                                                                                                                                                                                                                                                                                                                    | Immunocompromised persons                                                                                                                                                                                                                             | 153 (2.6%)                                                |
| V118-20                                                                                                                                                                                                                                                                                                                                                                                                                                                                                                                                                                                                                                                                                                                                                                                                                                                                                                                                                                                                                                                                                                                                   | Any clinical condition that, in the opinion of the Investigator, might interfere with the results of the study or pose additional risk to the subject due to participation in the study/immunocompromised persons.                                    | 1 541 (86.7%)                                             |
| V130-01                                                                                                                                                                                                                                                                                                                                                                                                                                                                                                                                                                                                                                                                                                                                                                                                                                                                                                                                                                                                                                                                                                                                   | Chronic illness that, in the opinion of the investigator, would interfere with the subject's safety during study participation and/or compliance with study-related procedures and/or with the evaluation of study vaccine/ immunocompromised persons | 666 (24.9%)                                               |
| <p><b>a.</b> QM01: participants with history of having ever received an influenza vaccine from 2008/2009 to 2010/2011 seasons. GQM04: participants with history of having ever received an influenza vaccine from 2009/2010 to 2011/2012 seasons. GQM07: participants with history of influenza vaccine for the 2014-2015 season. GQM11: participants with history of having ever received an influenza vaccine from 2011/2012 to 2013/2014 seasons. QID01: participants with history of influenza vaccine in the previous year. RPV03C: Participants with history of influenza vaccine in the previous 3 years. 112963: Participants with history of having ever received an influenza vaccine during the 3 prior seasons. 201251: Participants with history of having ever received an influenza vaccine during 4 prior seasons 114269/117036/117276: Participants with history of having ever received an influenza vaccine during 3 prior seasons. CSLCTQIV-13-01/V118-01/V118-20: Participants with previous influenza vaccination in the past 5 years. V58-23/V70-27/V130-01: Previous influenza vaccination without precision.</p> |                                                                                                                                                                                                                                                       |                                                           |

## Appendix D: Flow chart

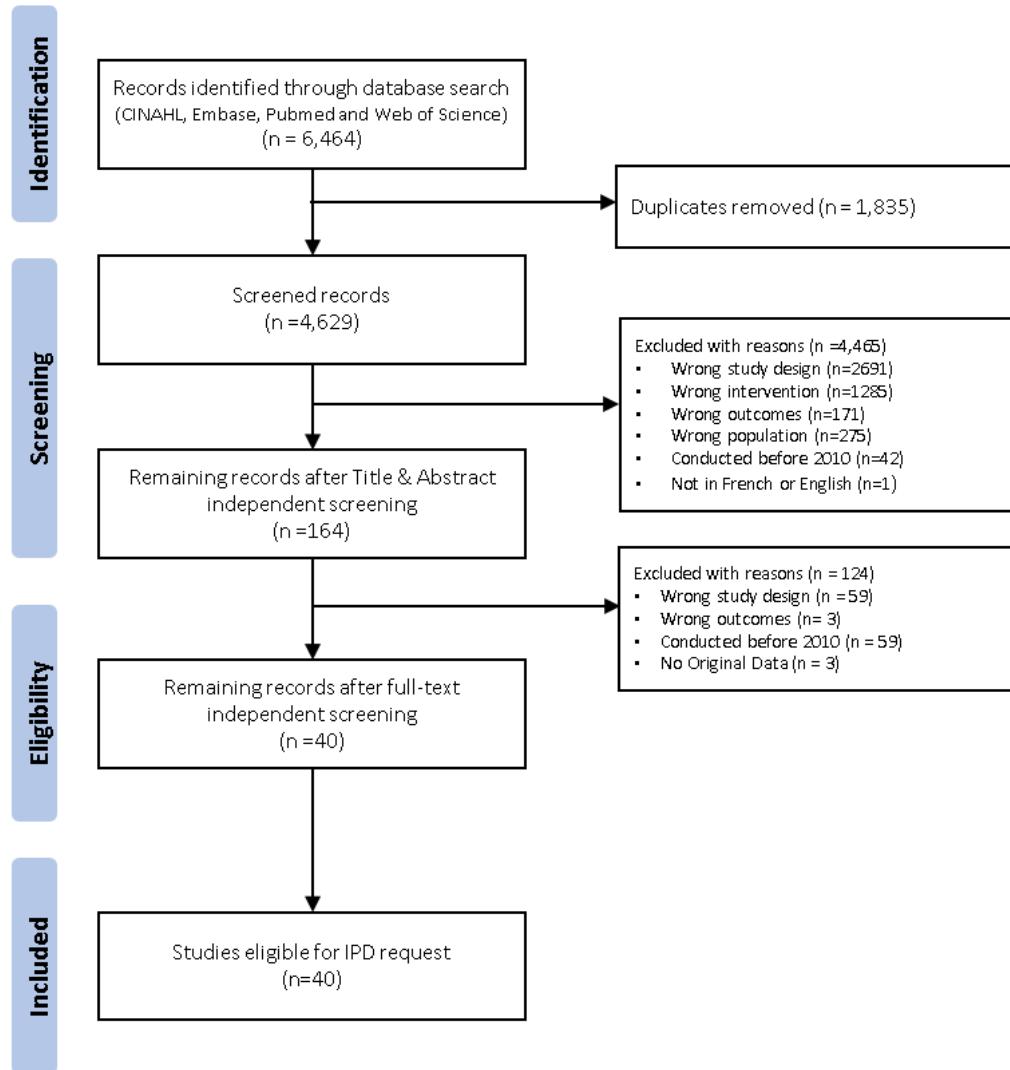

Figure D1: Study selection flowchart from literature search



## Appendix E

Table E1: Definitions of safety outcomes assessed in included studies (N=18)

| Study ID              | Safety outcomes of interest available                                                                                                                                                                                                                    | Injection site reactions (ISR) collected                                                 | Criteria for severe ISR (Grade 3)                                                                                                          | Systemic reactions collected                                | Criteria for severe systemic reactions (Grade 3)                   |
|-----------------------|----------------------------------------------------------------------------------------------------------------------------------------------------------------------------------------------------------------------------------------------------------|------------------------------------------------------------------------------------------|--------------------------------------------------------------------------------------------------------------------------------------------|-------------------------------------------------------------|--------------------------------------------------------------------|
| <b>Sanofi Pasteur</b> |                                                                                                                                                                                                                                                          |                                                                                          |                                                                                                                                            |                                                             |                                                                    |
| GQM01                 | Any solicited reactions: 7 days<br>Solicited injection site reactions (Grade 3)<br>Solicited systemic reactions (Grade 3)<br>Details for solicited reactions<br>Unsolicited events (n related): 21 days<br>Serious adverse events (n related): 6 months  | Pain<br>Erythema ≥ 25 mm<br>Swelling ≥ 25 mm<br>Induration ≥ 25 mm<br>Ecchymosis ≥ 25 mm | Symptoms that prevent normal, everyday activities.<br>Erythema > 100 mm<br>Swelling > 100 mm<br>Induration > 100 mm<br>Ecchymosis > 100 mm | Fever ≥ 38°C<br>Headache<br>Malaise<br>Myalgia<br>Shivering | Symptoms that prevent normal, everyday activities.<br>Fever ≥ 39°C |
| GQM04                 | Any solicited reactions: 7 days<br>Solicited injection site reactions (Grade 3)<br>Solicited systemic reactions (Grade 3)<br>Details for solicited reactions<br>Unsolicited events (n related): 21 days<br>Serious adverse events (n related): 6 months  | Pain<br>Erythema ≥ 25 mm<br>Swelling ≥ 25 mm<br>Induration ≥ 25 mm<br>Ecchymosis ≥ 25 mm | Symptoms that prevent normal, everyday activities.<br>Erythema > 100 mm<br>Swelling > 100 mm<br>Induration > 100 mm<br>Ecchymosis > 100 mm | Fever ≥ 38°C<br>Headache<br>Malaise<br>Myalgia<br>Shivering | Symptoms that prevent normal, everyday activities.<br>Fever ≥ 39°C |
| GQM07                 | Any solicited reactions: 7 days<br>Solicited injection site reactions (Grade 3)<br>Solicited systemic reactions (Grade 3)<br>Details for solicited reactions<br>Unsolicited events (n related): 21 days<br>Serious adverse events (n related): 21 days   | Pain<br>Erythema ≥ 25 mm<br>Swelling ≥ 25 mm<br>Induration ≥ 25 mm<br>Ecchymosis ≥ 25 mm | Symptoms that prevent normal, everyday activities.<br>Erythema > 100 mm<br>Swelling > 100 mm<br>Induration > 100 mm<br>Ecchymosis > 100 mm | Fever ≥ 38°C<br>Headache<br>Malaise<br>Myalgia<br>Shivering | Symptoms that prevent normal, everyday activities.<br>Fever ≥ 39°C |
| GQM11                 | Any solicited reactions: 7 days<br>Solicited injection site reactions (Grade 3)<br>Solicited systemic reactions (Grade 3)<br>Details for solicited reactions<br>Unsolicited events (n related): 21 days<br>Serious adverse events (n related) : 6 months | Pain<br>Erythema ≥ 25 mm<br>Swelling ≥ 25 mm<br>Induration ≥ 25 mm<br>Ecchymosis ≥ 25 mm | Symptoms that prevent normal, everyday activities.<br>Erythema > 100 mm<br>Swelling > 100 mm<br>Induration > 100 mm<br>Ecchymosis > 100 mm | Fever ≥ 38°C<br>Headache<br>Malaise<br>Myalgia<br>Shivering | Symptoms that prevent normal, everyday activities.<br>Fever ≥ 39°C |

| Study ID                     | Safety outcomes of interest available                                                                                                                                                                                                                           | Injection site reactions (ISR) collected                                                                     | Criteria for severe ISR (Grade 3)                                                                                                          | Systemic reactions collected                                     | Criteria for severe systemic reactions (Grade 3)                        |
|------------------------------|-----------------------------------------------------------------------------------------------------------------------------------------------------------------------------------------------------------------------------------------------------------------|--------------------------------------------------------------------------------------------------------------|--------------------------------------------------------------------------------------------------------------------------------------------|------------------------------------------------------------------|-------------------------------------------------------------------------|
| QID01                        | Any solicited reactions: 7 days<br>Solicited injection site reactions (Grade 3)<br>Solicited systemic reactions (Grade 3)<br>Details for solicited reactions<br>Unsolicited events (n related): 28 days<br>Serious adverse events (n related): 6 months         | Pain<br>Erythema $\geq$ 25 mm<br>Swelling $\geq$ 25 mm<br>Induration $\geq$ 25 mm<br>Ecchymosis $\geq$ 25 mm | Symptoms that prevent normal, everyday activities.<br>Erythema > 100 mm<br>Swelling > 100 mm<br>Induration > 100 mm<br>Ecchymosis > 100 mm | Fever $\geq$ 38°C<br>Headache<br>Malaise<br>Myalgia<br>Shivering | Symptoms that prevent normal, everyday activities.<br>Fever $\geq$ 39°C |
| QIV03                        | Any solicited reactions: 7 days<br>Solicited injection site reactions (Grade 3)<br>Solicited systemic reactions (Grade 3)<br>Details for solicited reactions<br>Unsolicited events (n related): 21 days<br>Serious adverse events (n related): 21 days          | Pain<br>Erythema $\geq$ 25 mm<br>Swelling $\geq$ 25 mm                                                       | Symptoms that prevent normal, everyday activities.<br>Erythema > 100 mm<br>Swelling > 100 mm                                               | Fever $\geq$ 38°C<br>Headache<br>Malaise<br>Myalgia              | Symptoms that prevent normal, everyday activities.<br>Fever $\geq$ 39°C |
| QIV06                        | Any solicited reactions: 7 days<br>Solicited injection site reactions (Grade 3)<br>Solicited systemic reactions (Grade 3)<br>Details for solicited reactions<br>Unsolicited events (n related): 28 days<br>Serious adverse events (n related): during the study | Pain<br>Erythema $\geq$ 25 mm<br>Swelling $\geq$ 25 mm                                                       | Symptoms that prevent normal, everyday activities.<br>Erythema > 100 mm<br>Swelling > 100 mm                                               | Fever $\geq$ 38°C<br>Headache<br>Malaise<br>Myalgia<br>Shivering | Symptoms that prevent normal, everyday activities.<br>Fever $\geq$ 39°C |
| RPV03C                       | Unsolicited events (n related): 28 days<br>Serious adverse events (n related): from vaccination to next visit                                                                                                                                                   | NA                                                                                                           | NA                                                                                                                                         | NA                                                               | NA                                                                      |
| <b>GlaxoSmithKline (GSK)</b> |                                                                                                                                                                                                                                                                 |                                                                                                              |                                                                                                                                            |                                                                  |                                                                         |

| Study ID           | Safety outcomes of interest available                                                                                                                                                                                                                   | Injection site reactions (ISR) collected          | Criteria for severe ISR (Grade 3)                                                            | Systemic reactions collected                                                                   | Criteria for severe systemic reactions (Grade 3)                   |
|--------------------|---------------------------------------------------------------------------------------------------------------------------------------------------------------------------------------------------------------------------------------------------------|---------------------------------------------------|----------------------------------------------------------------------------------------------|------------------------------------------------------------------------------------------------|--------------------------------------------------------------------|
| 112963             | Any solicited reactions: 7 days<br>Solicited injection site reactions (Grade 3)<br>Solicited systemic reactions (Grade 3)<br>Details for solicited reactions<br>Unsolicited events (n related): 30 days<br>Serious adverse events (n related): 6 months | Pain<br>Erythema > 20 mm<br>Swelling > 20 mm      | Symptoms that prevent normal, everyday activities.<br>Erythema > 100 mm<br>Swelling > 100 mm | Fever ≥ 38°C<br>Headache<br>Gastro-intestinal<br>Myalgia<br>Shivering<br>Arthralgia<br>Fatigue | Symptoms that prevent normal, everyday activities.<br>Fever ≥ 39°C |
| 201251             | Any solicited reactions: 7 days<br>Solicited injection site reactions (Grade 3)<br>Solicited systemic reactions (Grade 3)<br>Details for solicited reactions<br>Unsolicited events (n related): 21 days<br>Serious adverse events (n related) : 21 days | Pain<br>Erythema > 20 mm<br>Swelling > 20 mm      | Symptoms that prevent normal, everyday activities.<br>Erythema > 100 mm<br>Swelling > 100 mm | Fever ≥ 38°C<br>Headache<br>Gastro-intestinal<br>Myalgia<br>Shivering<br>Arthralgia<br>Fatigue | Symptoms that prevent normal, everyday activities.<br>Fever > 39°C |
| 114269             | Any solicited reactions<br>Solicited injection site reactions (Grade 3)<br>Solicited systemic reactions (Grade 3)<br>Details for solicited reactions<br>Unsolicited events (n related): 21 days<br>Serious adverse events (n related): 6 months         | Pain<br>Erythema > 20 mm<br>Swelling > 20 mm      | Symptoms that prevent normal, everyday activities.<br>Erythema > 100 mm<br>Swelling > 100 mm | Fever ≥ 38°C<br>Headache<br>Gastro-intestinal<br>Myalgia<br>Shivering<br>Arthralgia<br>Fatigue | Symptoms that prevent normal, everyday activities.<br>Fever > 39°C |
| 117036             | Any solicited reactions: 7 days<br>Solicited injection site reactions (Grade 3)<br>Solicited systemic reactions (Grade 3)<br>Details for solicited reactions<br>Unsolicited events (n related): 30 days                                                 | Pain<br>Erythema ≥ 20 mm<br>Swelling ≥ 20 mm      | Symptoms that prevent normal, everyday activities.<br>Erythema > 100 mm<br>Swelling > 100 mm | Fever ≥ 38°C<br>Headache<br>Gastro-intestinal<br>Myalgia<br>Shivering<br>Arthralgia<br>Fatigue | Symptoms that prevent normal, everyday activities.<br>Fever > 39°C |
| <b>CSL Seqirus</b> |                                                                                                                                                                                                                                                         |                                                   |                                                                                              |                                                                                                |                                                                    |
| CSLCT-QIV-13-01    | Solicited injection site reactions (Grade 3): 7 days<br>Solicited systemic reactions (Grade 3): 7 days<br>Details for solicited reactions<br>Serious adverse events: 6 months                                                                           | Pain<br>Erythema ≥ 20 mm<br>Swelling/Lump ≥ 20 mm | Symptoms that prevent normal, everyday activities.<br>Erythema ≥ 100 mm<br>Swelling ≥ 100 mm | Fever ≥ 38°C<br>Headache<br>Malaise<br>Myalgia<br>Nausea<br>Vomiting<br>Chills                 | Symptoms that prevent normal, everyday activities.<br>Fever ≥ 39°C |

| Study ID | Safety outcomes of interest available                                                                                                                                          | Injection site reactions (ISR) collected                                            | Criteria for severe ISR (Grade 3)                                                                                     | Systemic reactions collected                                                                                                      | Criteria for severe systemic reactions (Grade 3)                          |
|----------|--------------------------------------------------------------------------------------------------------------------------------------------------------------------------------|-------------------------------------------------------------------------------------|-----------------------------------------------------------------------------------------------------------------------|-----------------------------------------------------------------------------------------------------------------------------------|---------------------------------------------------------------------------|
| V118-18  | Solicited injection site reactions (Grade 3): 7 days<br>Solicited systemic reactions (Grade 3): 7 days<br>Details for solicited reactions<br>Serious adverse events: 12 months | Pain<br>Erythema $\geq$ 1 mm<br>Induration $\geq$ 1 mm<br>Ecchymosis $\geq$ 1 mm    | Symptoms that prevent normal, everyday activities.<br>Erythema > 100 mm<br>Induration > 100 mm<br>Ecchymosis > 100 mm | Fever $\geq$ 38°C<br>Headache<br>Arthralgia<br>Myalgia<br>Nausea<br>Vomiting<br>Chills<br>Diarrhea<br>Fatigue<br>Loss of appetite | Symptoms that prevent normal, everyday activities.<br>Fever $\geq$ 39°C   |
| V58-23   | Solicited injection site reactions (Grade 3): 7 days<br>Solicited systemic reactions (Grade 3): 7 days<br>Details for solicited reactions<br>Serious adverse events: 21 days   | Pain<br>Erythema, size ND<br>Induration, size ND<br>Ecchymosis, size ND             | Symptoms that prevent normal, everyday activities<br>Erythema, size ND<br>Induration, size ND<br>Ecchymosis, size ND  | Chills<br>Headache<br>Arthralgia<br>Myalgia<br>Nausea<br>Vomiting<br>Loss of appetite<br>Diarrhea<br>Fatigue                      | Symptoms that prevent normal, everyday activities.                        |
| V70-27   | Solicited injection site reactions (Grade 3): 7 days<br>Solicited systemic reactions (Grade 3): 7 days<br>Details for solicited reactions<br>Serious adverse events: 12 months | Pain<br>Erythema, size ND<br>Swelling, size ND<br>Induration, size ND<br>Tenderness | Symptoms that prevent normal, everyday activities<br>Erythema > 100 mm<br>Swelling > 100 mm<br>Induration > 100 mm    | Fever $\geq$ 38°C<br>Headache<br>Arthralgia<br>Myalgia<br>Nausea<br>Vomiting<br>Chills<br>Diarrhea<br>Fatigue                     | Symptoms that prevent normal, everyday activities.<br>Fever $\geq$ 40.5°C |
| V118-20  | Solicited injection site reactions (Grade 3): 7 days<br>Solicited systemic reactions (Grade 3): 7 days<br>Details for solicited reactions<br>Serious adverse events: 6 months  | Pain<br>Erythema $\geq$ 1 mm<br>Induration $\geq$ 1 mm<br>Ecchymosis $\geq$ 1 mm    | Symptoms that prevent normal, everyday activities.<br>Erythema > 100 mm<br>Induration > 100 mm<br>Ecchymosis > 100 mm | Fever $\geq$ 38°C<br>Headache<br>Arthralgia<br>Myalgia<br>Nausea<br>Vomiting<br>Chills<br>Diarrhea<br>Fatigue<br>Loss of appetite | Symptoms that prevent normal, everyday activities.<br>Fever $\geq$ 39°C   |

| Study ID | Safety outcomes of interest available                                                                                                                                         | Injection site reactions (ISR) collected                                | Criteria for severe ISR (Grade 3)                                                                                    | Systemic reactions collected                                                                                                                    | Criteria for severe systemic reactions (Grade 3)                     |
|----------|-------------------------------------------------------------------------------------------------------------------------------------------------------------------------------|-------------------------------------------------------------------------|----------------------------------------------------------------------------------------------------------------------|-------------------------------------------------------------------------------------------------------------------------------------------------|----------------------------------------------------------------------|
| V130-01  | Solicited injection site reactions (Grade 3): 7 days<br>Solicited systemic reactions (Grade 3): 7 days<br>Details for solicited reactions<br>Serious adverse events: 6 months | Pain<br>Erythema, size ND<br>Induration, size ND<br>Ecchymosis, size ND | Symptoms that prevent normal, everyday activities<br>Erythema, size ND<br>Induration, size ND<br>Ecchymosis, size ND | Fever $\geq 38^{\circ}\text{C}$<br>Headache<br>Arthralgia<br>Myalgia<br>Nausea<br>Vomiting<br>Chills<br>Diarrhea<br>Fatigue<br>Loss of appetite | Symptoms that prevent normal, everyday activities.<br>Fever, size ND |

NA: Not available ND: not defined

**Appendix F:**

Figure F1: Risk of bias assessment of included studies (N=18) as per ROBINS-1 tool.

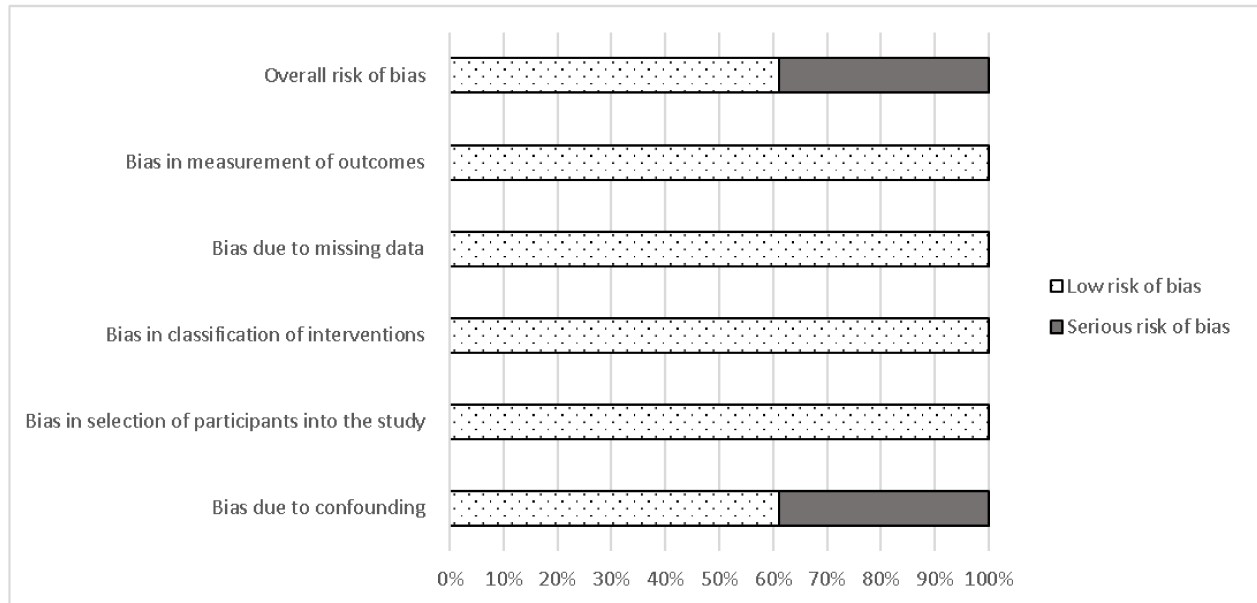

Table F1: Certainty of evidence using GRADE approach

| Certainty assessment                                |                       |                      |                      |              |             |                      | No of patients        |                       | Effect                           |                                                         | Certainty        | Importance |
|-----------------------------------------------------|-----------------------|----------------------|----------------------|--------------|-------------|----------------------|-----------------------|-----------------------|----------------------------------|---------------------------------------------------------|------------------|------------|
| No of studies                                       | Study design          | Risk of bias         | Inconsistency        | Indirectness | Imprecision | Other considerations | Females               | Males                 | Relative (95% CI)                | Absolute (95% CI)                                       |                  |            |
| <b>Injection site reactions (follow-up: 7 days)</b> |                       |                      |                      |              |             |                      |                       |                       |                                  |                                                         |                  |            |
| 17                                                  | observational studies | serious <sup>a</sup> | serious <sup>b</sup> | not serious  | not serious | none                 | 9057/20295<br>(44.6%) | 4695/13860<br>(33.9%) | <b>RR 1.34</b><br>(1.27 to 1.42) | <b>115 more per 1 000</b><br>(from 91 more to 142 more) | ⊕⊕○○<br>Low      | IMPORTANT  |
| <b>Systemic reactions (follow-up: 7 days)</b>       |                       |                      |                      |              |             |                      |                       |                       |                                  |                                                         |                  |            |
| 17                                                  | observational studies | serious <sup>a</sup> | not serious          | not serious  | not serious | none                 | 7392/20086<br>(36.8%) | 3900/13659<br>(28.6%) | <b>RR 1.26</b><br>(1.22 to 1.30) | <b>74 more per 1 000</b><br>(from 63 more to 86 more)   | ⊕⊕⊕○<br>Moderate | IMPORTANT  |

CI: confidence interval; RR: risk ratio

a. Risk of bias has been assessed using the ROBINS-I tool. Six studies were deemed at serious risk of confounding as there is no possibility to stratify results according to pre-specified age groups. Otherwise, all studies were considered at low risk of bias in all other domains. In sensitivity analysis, conclusions were unchanged after stratifying results according to other age groups. We downgraded the certainty of the evidence by one level as most of information are from studies at low risk of bias.

b. Moderate heterogeneity for injection site reactions (I<sup>2</sup>=70%, P value <0.0001 among younger participants and I<sup>2</sup>=73%, P value <0.0001 among older participants. Might partially be explained by the variation in definitions used for injection site reactions between studies and the impossibility to stratify results according to pre-specified age groups in some studies. The certainty of evidence was lowered by one level.

## Appendix G:

Table G1: Subgroup analyses for the association of sex and injection site reactions (ISR) following influenza vaccines (solicited period) among younger and older participants<sup>a</sup>

| Subgroups                   | Number of studies | Females |       | Males  |       | Risk ratio M-H, random (95% CI) | P-value for heterogeneity among subgroups |
|-----------------------------|-------------------|---------|-------|--------|-------|---------------------------------|-------------------------------------------|
|                             |                   | Events  | Total | Events | Total |                                 |                                           |
| <b>Younger participants</b> |                   |         |       |        |       |                                 |                                           |
| <b>Vaccine type</b>         |                   |         |       |        |       |                                 |                                           |
| QIV <sup>b</sup>            | 13                | 3557    | 5578  | 1829   | 3797  | 1.31 (1.22; 1.40)               | 0.40                                      |
| TIV <sup>c</sup>            | 11                | 2277    | 3976  | 1217   | 2648  | 1.25 (1.16; 1.35)               |                                           |
| <b>Risk of bias</b>         |                   |         |       |        |       |                                 |                                           |
| Low                         | 8                 | 4421    | 7232  | 2262   | 4738  | 1.29 (1.19; 1.40)               | 0.90                                      |
| Serious                     | 6                 | 1413    | 2322  | 784    | 1707  | 1.28 (1.16; 1.42)               |                                           |
| <b>Older participants</b>   |                   |         |       |        |       |                                 |                                           |
| <b>Vaccine type</b>         |                   |         |       |        |       |                                 |                                           |
| QIV <sup>b</sup>            | 11                | 1300    | 3832  | 725    | 3071  | 1.41 (1.25; 1.60)               | 0.55                                      |
| TIV <sup>c</sup>            | 9                 | 1923    | 6909  | 924    | 4344  | 1.50 (1.28; 1.76)               |                                           |
| <b>Risk of bias</b>         |                   |         |       |        |       |                                 |                                           |
| Low                         | 8                 | 2726    | 9375  | 1431   | 6326  | 1.33 (1.21; 1.46)               | <b>0.05<sup>d</sup></b>                   |
| Serious                     | 4                 | 497     | 1366  | 218    | 1089  | 1.73 (1.35; 2.22)               |                                           |

<sup>a</sup> Younger participant include those aged 18-64 years and older participants those aged 65 years and over. ISR have been collected within 7 days following vaccination. Events: Number of participants reporting at least one ISR during the period. Total: Number of participants with available data for solicited symptoms See Appendix A for the list of ISR collected in each study and the criteria used. Risk assessment has been done using the risk of bias in non-randomized studies of intervention (Robins-I) assessment tool. Studies were deemed at serious risk of bias due to confounding when there was no possibility to stratify results according to pre-specified age groups.

<sup>b</sup> Subgroup of participants who received QIV

<sup>c</sup> Subgroup of participants who received TIV.

<sup>d</sup> A P-value < 0.10 indicates a statistically significant subgroup difference.



## Appendix H:

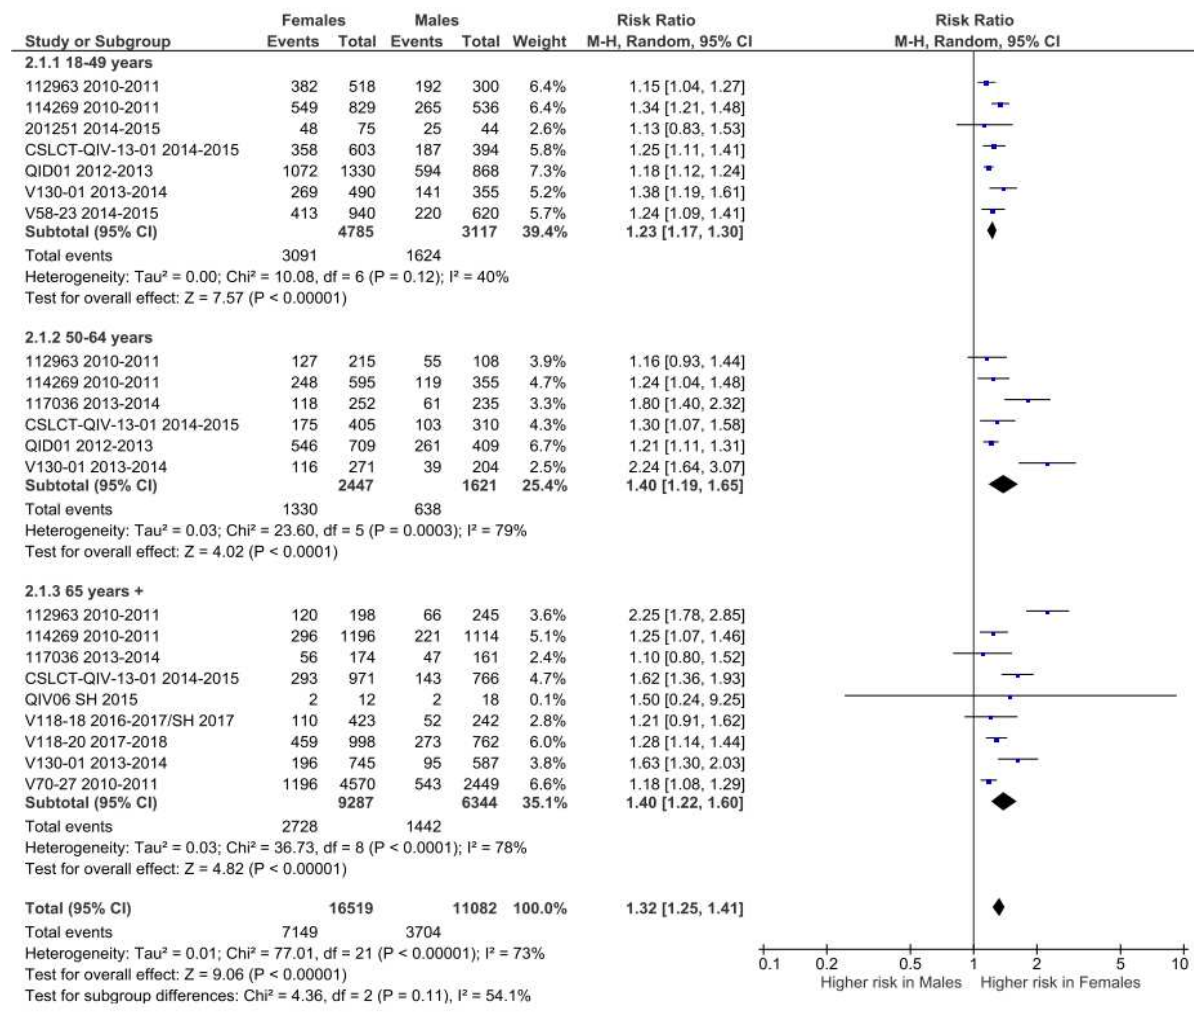

**Figure H1. Risk ratio for the association of sex with injection site reactions (ISR) following influenza vaccines (solicited period) among participants aged 18-49 years, 50-64 years and 65 years and over.**

Only studies for which we have the data for these age groups are included (N=12). ID used for each study refers to the clinical trial number followed by the Northern hemisphere influenza season; SH denotes Southern Hemisphere influenza season if applicable. ISR have been collected within 7 days following vaccination. Events: Number of participants reporting at least one solicited local reaction during the period. Total: Number of participants with available data for solicited symptoms. See Appendix E for the list of ISR collected in each study and the criteria used.

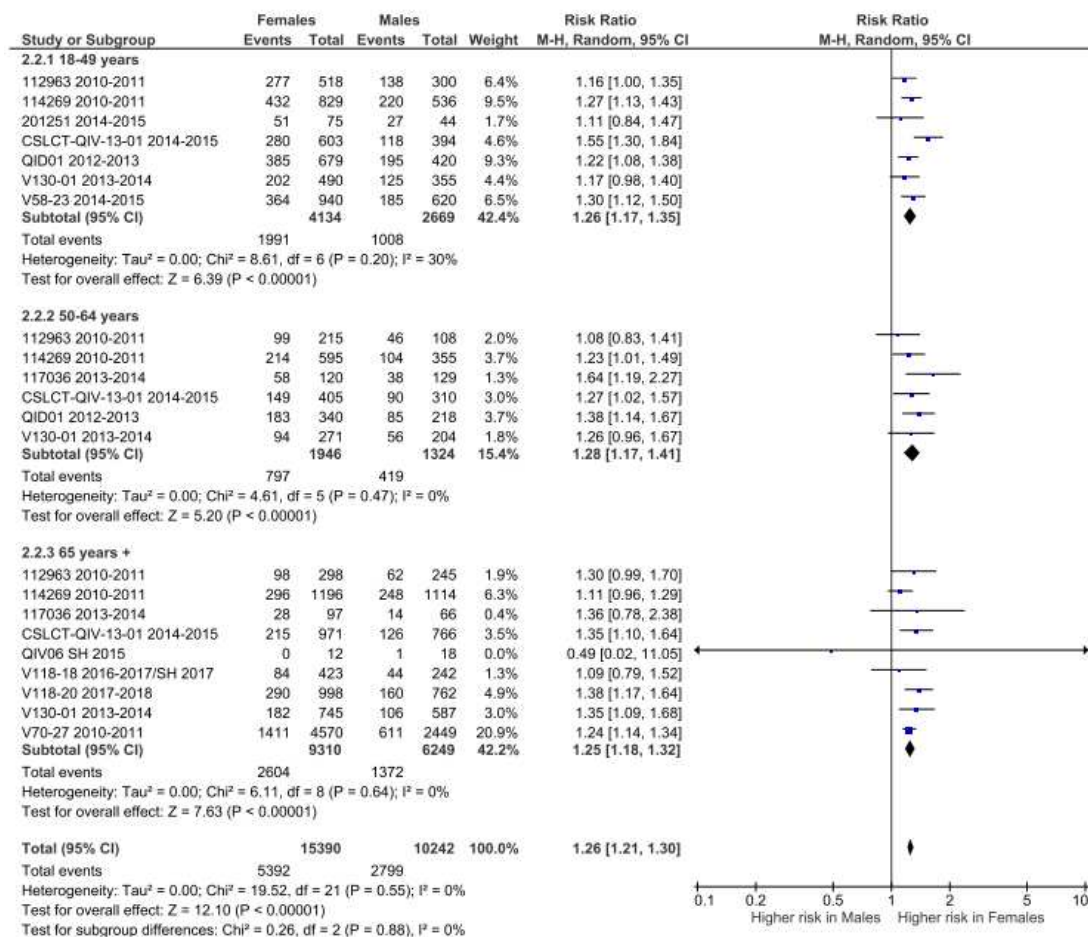

**Figure H2. Risk ratio for the association of sex with systemic reactions following influenza vaccines (solicited period) among participants aged 18-49 years, 50-64 years and 65 years and over.**

Only studies for which we have the data for these age groups are included (N=11). ID used for each study refers to the clinical trial number followed by the Northern hemisphere influenza season. SH: Southern Hemisphere influenza season. Local reactions have been collected within 7 days following vaccination. Events: Number of participants reporting at least one solicited systemic reaction during the period. Total: Number of participants with available data for solicited symptoms. See Appendix E for the list of systemic reactions collected in each study and the criteria used.

**Appendix I:****Generalized linear mixed models:**

Model 1:  $\text{Log} (P [\text{Injection site reactions} = 1 | X_i, Z_i]) = \beta_0 + \beta_1 \text{Sex} + \beta_2 \text{Age} + \gamma_0 + \gamma_1 \text{Sex}$

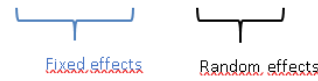

Model 2:  $\text{Log} (P [\text{Systemic reactions} = 1 | X_i, Z_i]) = \beta_0 + \beta_1 \text{Sex} + \beta_2 \text{Age} + \gamma_0 + \gamma_1 \text{Sex}$

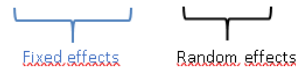

Where X=fixed variables and  $\beta$  =the effects (fixed) of these variables

Z=random variables and  $\gamma$  the effects (random) of these variables

The model allows that the effect of sex could vary between studies.

| <b>Measures</b>                                  | <b>Relative risk</b> | <b>95% Confidence intervals</b> |
|--------------------------------------------------|----------------------|---------------------------------|
| Association of sex with injection site reactions | 1.29                 | 1.19; 1.39                      |
| Association of sex with systemic reactions       | 1.21                 | 1.11; 1.31                      |

**Table 11: Corrections for multiple comparisons**

| Injection site reactions           |               |               | Systemic reactions            |               |               |
|------------------------------------|---------------|---------------|-------------------------------|---------------|---------------|
| Main analysis                      | P             | P'            | Main analysis                 | P             | P'            |
| <b>Outcomes</b>                    |               |               | <b>Outcomes</b>               |               |               |
| Overall ISR                        |               |               | Overall systemic reactions    |               |               |
| Younger participants               | 0.0001        | 0.0028        | Younger participants          | 0.0001        | 0.0019        |
| Older participants                 | 0.0001        | 0.0028        | Older participants            | 0.0001        | 0.0019        |
| Test for subgroup differences      | 0.1100        | 0.8800        | Test for subgroup differences | 0.7600        | 1.0000        |
| Grade 3 ISR                        |               |               | Grade 3 systemic reactions    |               |               |
| Younger participants               | 0.0004        | 0.0044        | Younger participants          | 0.0001        | 0.0019        |
| Older participants                 | 0.1400        | 0.8800        | Older participants            | 0.0001        | 0.0019        |
| Test for subgroup differences      | 0.7300        | 1.0000        | Test for subgroup differences | <b>0.0300</b> | <b>0.2400</b> |
| Pain                               |               |               | Fever                         |               |               |
| Younger participants               | 0.0001        | 0.0028        | Younger participants          | <b>0.0300</b> | <b>0.2400</b> |
| Older participants                 | 0.0001        | 0.0028        | Older participants            | 0.5900        | 1.0000        |
| Test for subgroup differences      | 0.2900        | 1.0000        | Test for subgroup differences | 0.3700        | 1.0000        |
| Redness                            |               |               | Headache                      |               |               |
| Younger participants               | 0.0001        | 0.0028        | Younger participants          | 0.0001        | 0.0019        |
| Older participants                 | 0.0001        | 0.0028        | Older participants            | 0.0001        | 0.0019        |
| Test for subgroup differences      | <b>0.0200</b> | <b>0.2000</b> | Test for subgroup differences | 0.8500        | 1.0000        |
| <b>Sensitivity analysis</b>        |               |               | Myalgia                       |               |               |
| <b>Outcomes</b>                    |               |               | Younger participants          | 0.0002        | 0.0020        |
| Overall ISR                        |               |               | Older participants            | 0.0030        | 0.0270        |
| 18-49 y                            | 0.0001        | 0.0028        | Test for subgroup differences | 0.6400        | 1.0000        |
| 50-64 y                            | 0.0001        | 0.0028        | <b>Sensitivity analysis</b>   |               |               |
| 65+ y                              | 0.0001        | 0.0028        | <b>Outcomes</b>               |               |               |
| Test for subgroup differences      | 0.1100        | 0.8800        | Overall systemic reactions    |               |               |
| Overall ISR - younger participants |               |               | 18-49 y                       | 0.0001        | 0.0019        |
| QIV vaccine                        | 0.0001        | 0.0028        | 50-64 y                       | 0.0001        | 0.0019        |
| TIV vaccine                        | 0.0001        | 0.0028        | 65+ y                         | 0.0001        | 0.0019        |
| Test for subgroup differences      | 0.4000        | 1.0000        | Test for subgroup differences | 0.8800        | 1.0000        |
| Overall ISR – older participants   |               |               |                               |               |               |
| QIV vaccine                        | 0.0001        | 0.0028        |                               |               |               |
| TIV vaccine                        | 0.0001        | 0.0028        |                               |               |               |
| Test for subgroup differences      | 0.5500        | 1.0000        |                               |               |               |
| Overall ISR younger participants   |               |               |                               |               |               |
| Low/moderate risk of bias          | 0.0001        | 0.0028        |                               |               |               |
| Serious risk of bias               | 0.0001        | 0.0028        |                               |               |               |
| Test for subgroup differences      | 0.9000        | 1.0000        |                               |               |               |
| Overall ISR – older participants   |               |               |                               |               |               |
| Low/moderate risk of bias          | 0.0001        | 0.0028        |                               |               |               |
| Serious risk of bias               | 0.0001        | 0.0028        |                               |               |               |
| Test for subgroup differences      | <b>0.0500</b> | <b>0.4500</b> |                               |               |               |

P': p-value adjusted for the multiple comparisons by the Holm method.
